# Supplementary material for: Simultaneous and highly sensitive determination of PCBs and PBDEs in environmental water and sediments by gas chromatography coupled to high resolution magnetic sector mass spectrometry
Source: Royal Society of Chemistry journal article supplement (doi:10.1039/c5ay00017c), 2015-01-01
Supplement: c5ay00017c1.pdf [file c5ay00017c1.pdf]

**SIMULTANEOUS AND HIGH SENSITIVE DETERMINATION OF PCBs AND  
PBDEs IN ENVIRONMENTAL WATER AND SEDIMENTS BY GAS  
CHROMATOGRAPHY COUPLED TO HIGH RESOLUTION MAGNETIC  
SECTOR MASS SPECTROMETRY**

Nieves Barco-Bonilla, Antonio José Nieto-García, Roberto Romero-González, José Luis Martínez Vidal, Antonia Garrido Frenich\*

Department of Chemistry and Physics (Analytical Chemistry Area), Andalusian Center for the Assessment and Monitoring of Global Change (CAESCG), University of Almería, Almería, Spain.

Corresponding author: Tel.: +34 950015985; fax: +34 950015483. E-mail address: [agarrido@ual.es](mailto:agarrido@ual.es) (A. Garrido Frenich)

This document provides more detailed information to the main paper mentioned above.

The following information is included:

| <b>Content</b>                                                                                        | <b>Page</b> |
|-------------------------------------------------------------------------------------------------------|-------------|
| Table S1. Occurrence and concentration (ng/L) of PCBs and PBDEs in the analyzed surface water samples | 2           |

**Table S-1. Occurrence and concentration (ng/L) of PCBs and PBDEs in the analyzed surface water samples<sup>a</sup>**

| Compounds       | S1    | S2    | S3    | S4    | S5    | S6    | S7    | S8    | S9   | S10  | S11   | S12  | S13  | S14   | S16   | S18   | S19   |
|-----------------|-------|-------|-------|-------|-------|-------|-------|-------|------|------|-------|------|------|-------|-------|-------|-------|
| PCB 28 + PCB 31 | < LOQ |       |       |       |       |       |       |       |      |      |       |      |      |       |       |       |       |
| PCB 52          | 0.06  |       |       |       |       |       |       |       |      |      |       |      |      | < LOQ |       |       |       |
| PCB 44          | 0.05  |       |       |       |       |       |       |       |      |      |       |      |      | < LOQ |       |       |       |
| PCB 66          | < LOQ |       |       |       |       |       |       |       | 0.06 | 0.06 |       |      |      | < LOQ |       |       |       |
| PCB 101         | < LOQ |       |       |       |       |       |       |       |      |      |       |      |      | < LOQ |       |       | < LOQ |
| PCB 81          | < LOQ |       | 0.05 | 0.06 |       | 0.05 | 0.06 | 0.06  | < LOQ | < LOQ | 0.07  |
| PCB 123         |       |       |       |       |       |       |       |       |      |      |       |      |      |       |       |       | < LOQ |
| PCB 153         |       |       |       |       |       |       |       |       |      |      |       |      |      |       |       |       | < LOQ |
| PCB 105         |       |       |       |       |       |       |       |       |      |      |       |      |      |       |       |       | < LOQ |
| PCB 138         |       |       |       |       |       |       |       |       |      |      |       |      |      |       |       |       | < LOQ |
| PCB 126         |       |       |       |       |       |       |       |       |      |      |       |      |      |       |       |       | 0.05  |
| PCB 128         |       |       |       |       | < LOQ |       |       |       |      |      |       |      |      |       |       |       |       |
| PCB 156         |       |       |       |       |       |       |       |       |      |      |       |      |      |       |       |       | < LOQ |
| PCB 157         |       |       |       |       |       |       |       |       |      |      |       |      |      |       |       |       | < LOQ |
| BDE 47          |       |       |       |       |       |       |       |       |      | 0.20 |       |      |      | 0.06  |       |       |       |
| PCB 169         |       |       |       |       |       |       |       |       |      |      |       |      |      |       |       |       | < LOQ |
| PCB 170         |       |       |       |       |       |       |       |       |      |      |       |      |      |       |       |       | < LOQ |
| PCB 194         |       |       |       |       |       |       |       |       |      |      |       |      |      |       |       |       | < LOQ |
| BDE 99          |       |       |       |       |       |       |       | < LOQ |      | 0.07 | < LOQ |      |      |       |       |       |       |
| PCB 206         |       |       |       |       |       |       |       |       |      |      |       |      |      |       |       |       | 0.05  |
| PCB 209         |       |       |       |       |       |       |       |       |      |      |       |      |      |       |       |       | < LOQ |
| BDE 153         |       |       |       |       |       |       |       |       |      | 0.05 |       |      |      |       |       |       |       |

<sup>a</sup> Abbreviations: LOQ: limit of quantification
